# Supplementary material for: Metformin Potentiates the Benefits of Dietary Restraint: A Metabolomic Study
Source: Int J Mol Sci. 2017 Oct 28;18(11):2263. doi: 10.3390/ijms18112263 (PMC5713233; doi:10.3390/ijms18112263)
Supplement: Supplementary file 1 [file ijms-18-02263-s001.pdf]

# Metformin potentiates the benefits of dietary restraint: a metabolomic study

Marta Riera-Borrull <sup>1,2</sup>, Anabel García-Heredia <sup>1</sup>, Salvador Fernández-Arroyo <sup>1,3</sup>, Anna Hernández-Aguilera <sup>1</sup>, Noemí Cabré <sup>1</sup>, Elisabet Cuyàs <sup>3,4</sup>, Fedra Luciano-Mateo <sup>1</sup>, Jordi Camps <sup>1</sup>, Javier A. Mendendez <sup>3,4</sup> and Jorge Joven <sup>1,5\*</sup>.

## Supplementary material and methods S1: Food intake measurement

Food intake measurement was performed as previously reported [1]. Mice were group housed and given a known, pre-weighed amount of food in their home cage hopper. Once a week, the remaining food is weighed. Then, new amount of food is administered. Calculations were performed as follow: Food intake = Food provided – Food ingested – food wasted. Food intake measurements were divided by the number of animals per home cage, so assuming a mean-intake per animals, and represented in g, although it can be easily converted to kcal, by using data on Table S1.

[1] Ellacott KLJ et al., *Cell Metab*, 2010.

**Table S1: Nutritional composition of experimental diets..**

|                                           | CD (Chow diet) | HFD (High-fat diet) |
|-------------------------------------------|----------------|---------------------|
| <b>Crude Nutrients</b>                    |                |                     |
| Crude protein (%)                         | 16.1           | 24.10               |
| Crude fat (%)                             | 3.1            | 34.60               |
| Crude fibre (%)                           | 3.9            | 7.2                 |
| Carbohydrate (available) (%)              | 71.8           | 24.80               |
| Crude ash (%)                             | 4.2            | 8.5                 |
| Nitrogen free extracts (%)                | 43.5           | 23.30               |
| <b>Energy</b>                             |                |                     |
| Energy density (Kcal/g (Kj/g))            | 3.3 (13.97)    | 5.70 (24)           |
| Calories from protein (%)                 | 19.3           | 19                  |
| Calories from fat (%)                     | 8.4            | 60                  |
| Calories from carbohydrate (%)            | 72.4           | 21                  |
| <b>Minerals</b>                           |                |                     |
| Calcium (%)                               | 1.38           | 0.98                |
| Phosphorus (%)                            | 0.99           | 0.65                |
| Sodium (%)                                | 0.47           | 0.20                |
| Magnesium (%)                             | 0.34           | 0.17                |
| Potassium (%)                             | 1.45           | 0.98                |
| Chloride (%)                              | 0.69           | -                   |
| <b>Fatty acids</b>                        |                |                     |
| Caprid acid (C10:0) (%)                   | ND             | 0.04                |
| Lauric acid (C12:0) (%)                   | ND             | 0.07                |
| Myristic acid (C14:0) (%)                 | ND             | 0.44                |
| Palmitic acid (C16:0) (%)                 | 0.87           | 7.72                |
| Palmitoleic acid (C16:1) (%)              | 0.03           | 0.94                |
| Margaric acid (C17:0) (%)                 | ND             | -                   |
| Stearic acid (C18:0) (%)                  | 0.08           | 4.34                |
| Oleic acid (C18:1) (%)                    | 0.53           | 13.57               |
| Linoleic acid (C18:2) (%)                 | 1.34           | 4.75                |
| Linolenic acid (C18:3) (%)                | 0.15           | 0.51                |
| Arachidic acid (C20:0) (%)                | ND             | 0.02                |
| Paullinic acid (C20:1) (%)                | ND             | 0.01                |
| Arachidonic acid (C20:4) (%)              | ND             | 0.53                |
| Cholesterol (mg/kg)                       | ND             | 265                 |
| <b>Amino acids</b>                        |                |                     |
| Lysine (%)                                | 3.9            | 1.98                |
| Methionine (%)                            | 1.49           | 0.83                |
| Cystine (%)                               | 1.08           | 0.46                |
| Met+Cys (%)                               | ND             | 1.28                |
| Threonine (%)                             | ND             | 1.07                |
| Tryptophan (%)                            | 0.88           | 0.31                |
| Arginine (%)                              | 4.75           | 0.88                |
| Histidine (%)                             | ND             | 0.76                |
| Valine (%)                                | ND             | 1.64                |
| Isoleucine (%)                            | ND             | 1.25                |
| Leucine (%)                               | ND             | 2.36                |
| Phenylalanine (%)                         | ND             | 1.29                |
| Phe+Tyr (%)                               | ND             | 2.57                |
| Glycine (%)                               | 0.41           | 0.50                |
| Glutamic acid (%)                         | ND             | 5.41                |
| Aspartic acid (%)                         | ND             | 1.79                |
| Proline (%)                               | ND             | 2.76                |
| Alanine (%)                               | ND             | 0.79                |
| Serine (%)                                | ND             | 1.43                |
| <b>Vitamins</b>                           |                |                     |
| Vitamin A (IU/kg)                         | 7500           | 15000               |
| Vitamin D <sub>3</sub> (IU/kg)            | 1000           | 1500                |
| Vitamin E (IU/kg)                         | 120            | 225                 |
| Vitamin K (as menadione) (mg/Kg)          | 2.5            | 20                  |
| Vitamin C (mg/Kg)                         | ND             | 30                  |
| Thiamin (B <sub>1</sub> ) (mg/Kg)         | 7              | 16                  |
| Riboflavin (B <sub>2</sub> ) (mg/Kg)      | 6.5            | 16                  |
| Pyridoxime (B <sub>6</sub> ) (mg/Kg)      | 2.6            | 18                  |
| Cyanocobalamin (B <sub>12</sub> ) (µg/Kg) | 20             | 30                  |
| Nicotinic acid (mg/Kg)                    | 75             | 45                  |
| Pantothenic acid (mg/Kg)                  | 17             | 55                  |
| Folic acid (mg/Kg)                        | 0.5            | 19                  |
| Biotin (µg/Kg)                            | 40             | 310                 |
| Choline-Chloride (mg/Kg)                  | 1600           | 2300                |
| Inositol (mg/Kg)                          | ND             | 80                  |
| <b>Trace elements</b>                     |                |                     |
| Iron (mg/Kg)                              | 280            | 139                 |
| Manganese (mg/Kg)                         | 90             | 82                  |
| Zinc (mg/Kg)                              | 64             | 56                  |
| Copper (mg/Kg)                            | 18             | 12                  |
| Iodine (mg/Kg)                            | ND             | 0.97                |
| Selenium (mg/Kg)                          | ND             | 0.13                |
| Cobalt (mg/Kg)                            | ND             | 0.13                |
